# Supplementary material
Source: Springer Nature journal article supplement (https://www.springermedizin.de/resource/supplementary/12913_2013_2684_MOESM11_ESM.pdf/9531122)
Supplement: MOESM11 [file 9531122]

Universitair Medisch Centrum **Instituut Waarborging  
Kwaliteit en Veiligheid**  
Commissie Mensgebonden Onderzoek  
regio Arnhem - Nijmegen

578

mw. drs. M.E.C. Hanskamp-Sebregts,  
Instituut Waarborging Kwaliteit en Veiligheid,  
Huispost 904

Huispost 578  
Postbus 9101  
6500 HB Nijmegen

UMC St Radboud Centraal, route 578  
Geert Groteplein 10

T (024) 361 31 54  
F (024) 361 01 48

[cmo@iwkv.umcn.nl](mailto:cmo@iwkv.umcn.nl)  
[www.umcn.nl](http://www.umcn.nl)  
[www.cmoregio-a-n.nl](http://www.cmoregio-a-n.nl)

Datum 11 juli 2011  
Ons kenmerk CD/CMO 0793

**Titel: The effects of auditing on patient safety in hospital care Results in a Dutch hospital at ward level**  
**Registratienummer: 2011/278**

Geachte mevrouw Hanskamp-Sebregts,

In antwoord op uw e-mail van 4 juli 2011 bericht ik u namens de CMO als volgt.

Met inachtneming van hetgeen dienaangaande in de Wet medisch-wetenschappelijk onderzoek (WMO) is bepaald, oordeelt de commissie dat het onderzoek niet valt aan te merken als een onderzoek dat valt onder de reikwijdte van WMO.

Dit betekent dat het onderzoek kan worden uitgevoerd zonder beoordeling door de CMO als erkende commissie. Het onderzoek hoeft voorts op grond van het geldende recht en de geldende ziekenhuisvoorschriften ter zake getoetst te worden door de CMO als lokale commissie.

Dit oordeel is gebaseerd op de volgende documenten:

- E-mail van mw. M. Hanskamp-Sebregts d.d. 4 juli 2011, waarbij gevoegd:
- Onderzoeksvoorstel, versie 04 d.d. juli 2011
- Uitnodigingsbrief voor deelname aan de CQ-index meting
- Informatie voor afdeling
- Informed consent
- Bedank-herinneringsbrief CQ-index meting
- CQ-index vragenlijst
- Opzet CQ-index meting

Ik vertrouw erop u met deze brief van dienst te zijn en namens de commissie wens ik u succes met de uitvoering van het onderzoek.

Met vriendelijke groet,

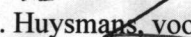  
Dr. F. Huysmans, voorzitter
